# Supplementary material
Source: Springer Nature journal article supplement (https://www.springermedizin.de/resource/supplementary/12874_2010_602_MOESM3_ESM.pdf/9432568)
Supplement: MOESM3 [file 9432568]

Group 1

Group 2

Group 3

Drug

Placebo

Drug +

24-h Holter ECG

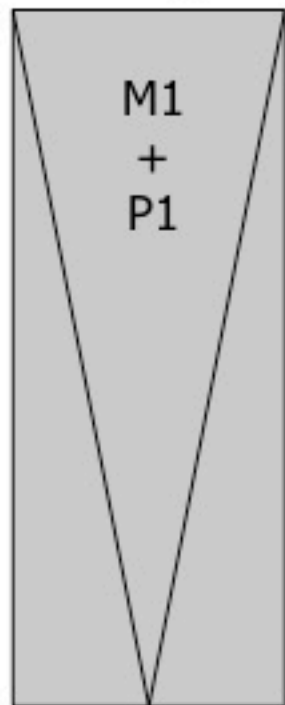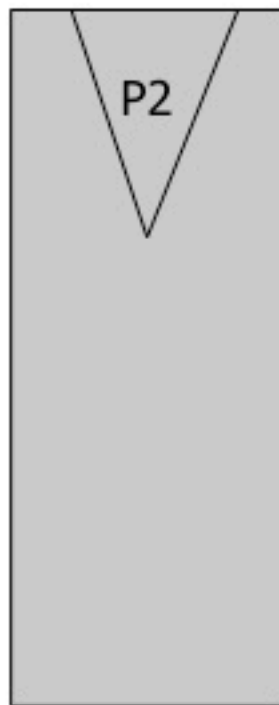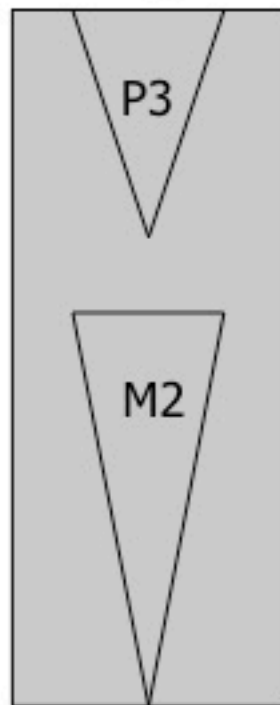

**+: with a 12 h delayed response on the target variable**

Assumption:  $M1 = M2$  und  $P2 = P3$

Hypothesis:  $M1 + P1 \neq M2 + P3$
